# Supplementary material for: Integrative analysis of single-cell and bulk RNA sequencing unveils a machine learning-based pan-cancer major histocompatibility complex-related signature for predicting immunotherapy efficacy
Source: PubMed Central journal article supplement (PMC11076435; doi:10.1007/s00262-024-03714-5), 2024-05-07
Supplement: 262_2024_3714_MOESM1_ESM.pdf [file 262_2024_3714_MOESM1_ESM.pdf]

**Integrative Analysis of Single-Cell and Bulk RNA Sequencing  
Unveils a Machine Learning-Based Pan-Cancer Major  
Histocompatibility Complex-Related Signature for Predicting  
Immunotherapy Efficacy**

**Additional files**

**Table S1. List of 75 immune-related genes.**

|          |          |          |          |          |        |          |
|----------|----------|----------|----------|----------|--------|----------|
| HLA-DQB1 | MICA     | HLA-A    | HLA-DQB2 | MICB     | HLA-B  | HLA-DPA1 |
| HLA-DQA1 | HLA-DRB1 | HLA-DPB1 | HLA-DRA  | HLA-DQA2 | HLA-C  | HLA-DRB5 |
| ICAM1    | ITGB2    | SELP     | BTN3A2   | C10orf54 | SLAMF7 | PDCD1LG2 |
| CD276    | BTN3A1   | CD274    | VTCN1    | CD80     | ICOSLG | CD28     |
| VEGFB    | TGFB1    | CCL5     | IFNA1    | CD70     | IL4    | TNFSF4   |
| IFNA2    | IL2      | IL10     | CX3CL1   | TNFSF9   | TNF    | IL12A    |
| IFNG     | CXCL9    | IL13     | IL1A     | CD40LG   | IL1B   | CXCL10   |
| VEGFA    | ARG1     | GZMA     | PRF1     | ENTPD1   | HMGB1  | IDO1     |
| TNFRSF4  | KIR2DL3  | BTLA     | TNFRSF14 | ADORA2A  | CTLA4  | TNFRSF18 |
| IL2RA    | HAVCR2   | PDCD1    | TIGIT    | TNFRSF9  | ICOS   | TLR4     |
| CD27     | LAG3     | CD40     | KIR2DL1  | EDNRB    |        |          |

**Table S2. Primer sequences for genes.**

| Name       | Sequence (5'→3')          |
|------------|---------------------------|
| B2M-F      | GGAGGCTATCCAGCGTACTCCA    |
| B2M-R      | CGGATGGATGAAACCCAGACACA   |
| HLA-B-F    | GCCGCGAGTCCGAGGAC         |
| HLA-B-R    | CGCAGGTTCCGCAGG           |
| HLA-C-F    | CCATGAGGTATTTGTGGACCG     |
| HLA-C-R    | TCTCGGACTCTCGTCGTCG       |
| HLA-DMA-F  | ACTCACGAAATTGACCGCTACAC   |
| HLA-DMA-R  | CGCCACACAGCACATTCTCC      |
| HLA-DMB-F  | ACATACCAGACCTCTCCCATTTAG  |
| HLA-DMB-R  | CAGGTGTCCAGTCCCGAAGG      |
| HLA-DOA-F  | CCTACGGACCCGCCTTCTA       |
| HLA-DOA-R  | GGCCTCGCTTTTCTTCAGG       |
| HLA-DQA1-F | TGGGCAGTCAGTCACAGAAGG     |
| HLA-DQA1-R | TCATCAGCAGAAGGGAGGAAGG    |
| HLA-DPB1-F | CAGCACCACAACCTGCTTG       |
| HLA-DPB1-R | CCATTCAGGAACCATCGGACT     |
| HLA-DRA-F  | AGTCCCTGTGCTAGGATTTTCA    |
| HLA-DRA-R  | ACATAAACTCGCCTGATTGGTC    |
| HLA-DRB-F  | AGCGGCGAGTCCAACCTAAG      |
| HLA-DRB-R  | TTCAATGCTGCCTGGATAGAAACC  |
| HLA-E-F    | TTCCGAGTGAATCTGCGGAC      |
| HLA-E-R    | GTCGTAGGCGAACTGTTCATAC    |
| KCNA6-F    | TGCCTGTGCCCGTCATCG        |
| KCNA6-R    | TTGCCAAGTCCGTTGTCAGTTG    |
| PIK3R3-F   | GGATGCTATGCTTGCTCTGTGG    |
| PIK3R3-R   | CAAGGATGTCTGCTGGTAATGGAG  |
| RGS5-F     | CTTGAGTTCTGGATTGCCTGTGAG  |
| RGS5-R     | TTGTGATGTCCTTAGTGAAGTGGTC |
| TAP1-F     | CTGGGGAAGTCACCCTACC       |
| TAP1-R     | CAGAGGCTCCCGAGTTTGTG      |
| TAP2-F     | TGGACGCGGCTTTACTGTG       |
| TAP2-R     | GCAGCCCTCTTAGCTTTAGCA     |
| TAPBP-F    | CCTGGAGGTAGCAGGTCCTTC     |
| TAPBP-R    | ATCCTTGCAGGTGGACAGGTA     |
| TARDBP-F   | GGTAACCGAAGATGAGAACGATGAG |
| TARDBP-R   | CACTGGATTCTGTAGCGAAGC     |
| TOP2A-F    | TCCGCCCAGACACCTACATTG     |
| TOP2A-R    | TGTCCGCAGCATTAACTAGAATCTC |

|                  |                      |
|------------------|----------------------|
| $\beta$ -actin-F | ATCACCATTGGCAATGAGCG |
| $\beta$ -actin-R | TTGAAGGTAGTTTCGTGGAT |

**Table S3. Details for 8 LGG-related Hub-MHCsig.**

| Antibody | No.       | Manufacturer |
|----------|-----------|--------------|
| B2M      | ab218230  | Abcam        |
| HLA-B    | ab193415  | Abcam        |
| HLA-DOA  | ab224668  | Abcam        |
| HLA-DPB1 | ab224668  | Abcam        |
| HLA-DRA  | ab92511   | Abcam        |
| HLA-E    | abb300553 | Abcam        |
| TAP1     | ab314745  | Abcam        |
| TAP2     | ab307282  | Abcam        |

**Table S4. List of 21 MHC-related genes.**

|          |          |          |          |          |          |         |
|----------|----------|----------|----------|----------|----------|---------|
| B2M      | HLA-A    | HLA-B    | HLA-C    | HLA-DMA  | HLA-DMB  | HLA-DOA |
| HLA-DOB  | HLA-DPA1 | HLA-DPB1 | HLA-DQA1 | HLA-DQA2 | HLA-DQB1 | HLA-DRA |
| HLA-DRB1 | HLA-E    | HLA-F    | HLA-G    | TAP1     | TAP2     | TAPBP   |

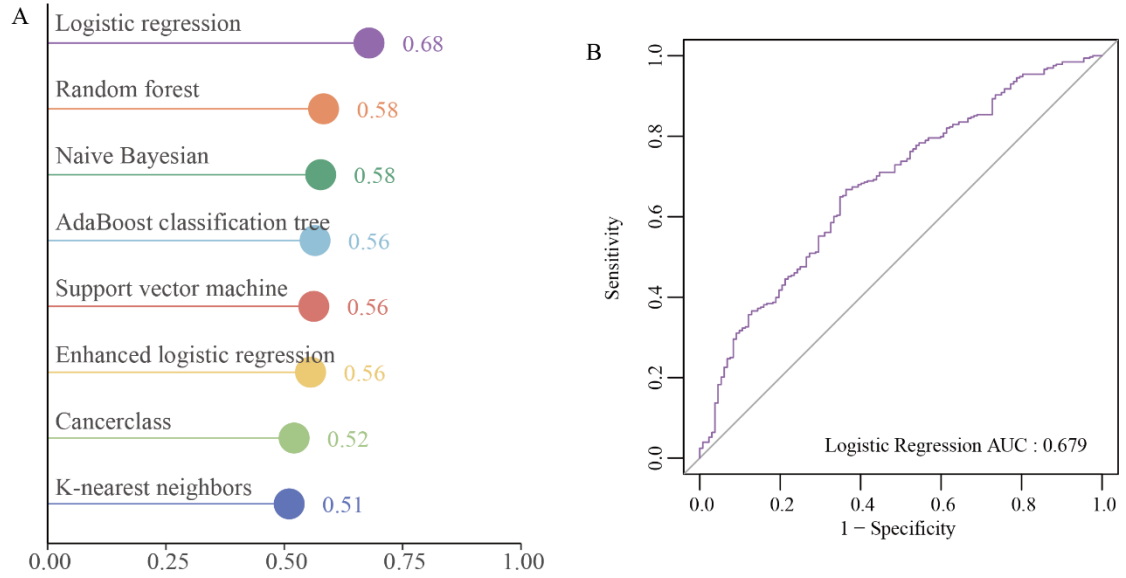

**Figure S1. Prediction of immunotherapy outcomes using MHCsig.** A. The performance of the prediction model constructed by 8 machine learning algorithms in the validation cohort. B. The receiver operating characteristic plot of the logistic regression model (MHCsig model) in the validation cohort.

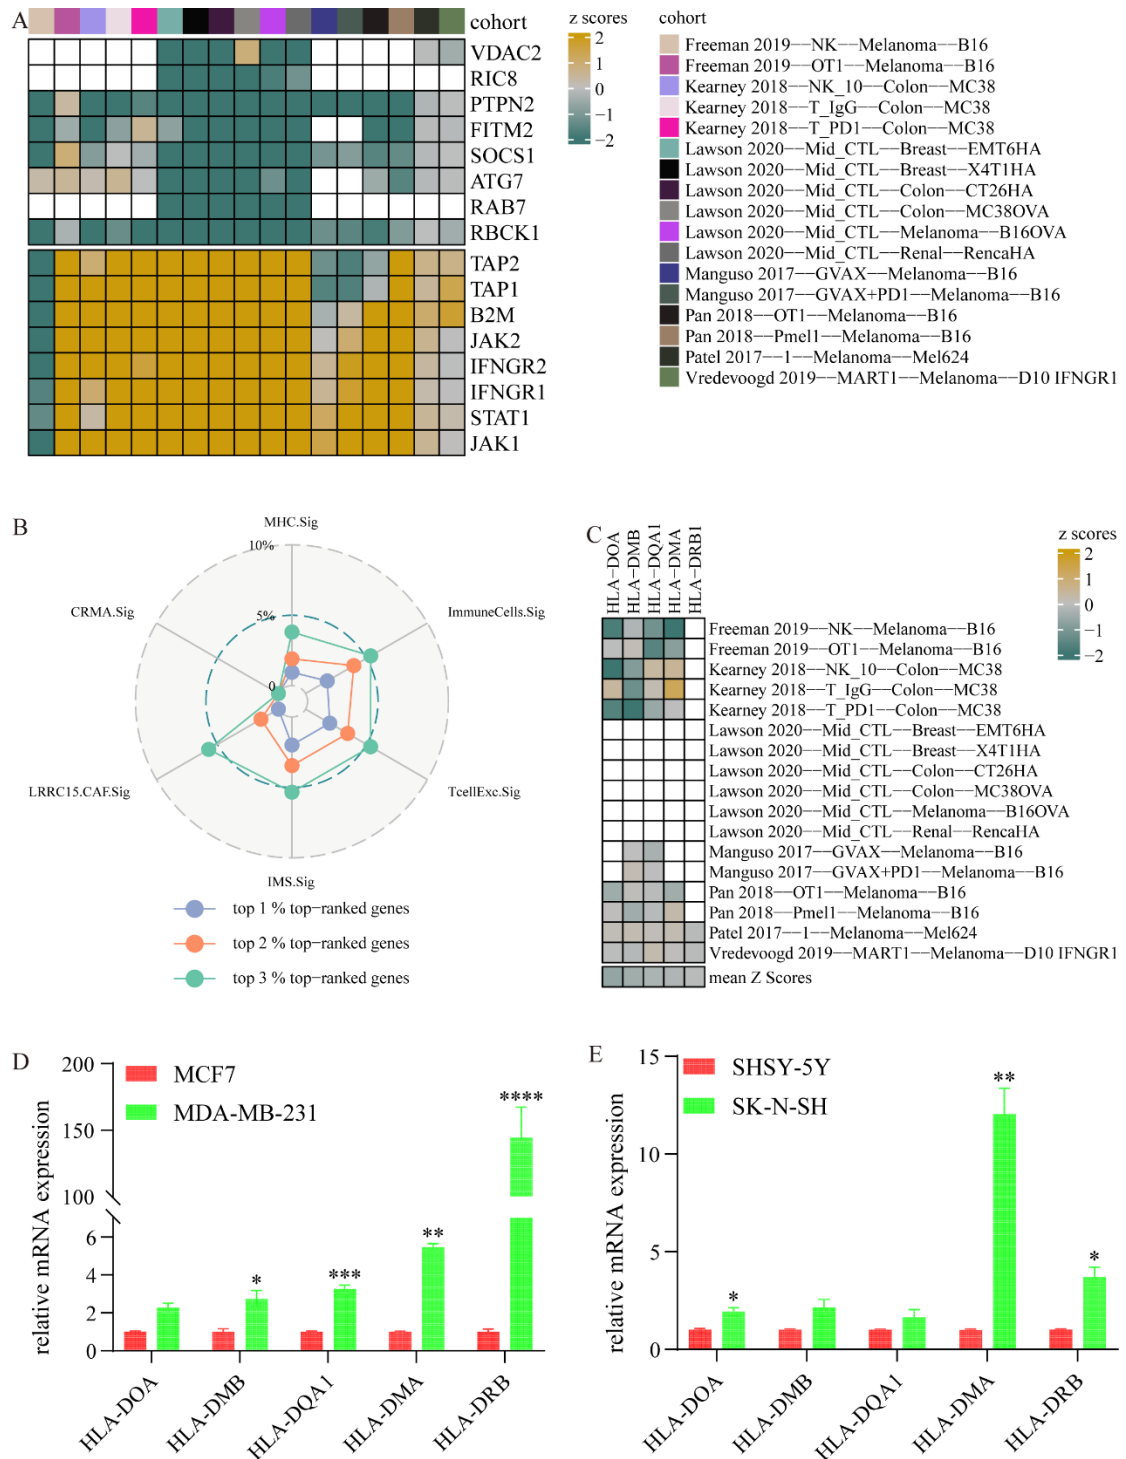

**Figure S2. Screening of the potential therapeutic targets screened from MHCsig.**

A. Gene ranking based on knockdown effects on antitumor immunity in 17 CRISPR/Cas9 datasets. B. Radar plot comparing the percentage of top-ranked genes among MHCsig and other 5 immune-resistant signatures. C. Heatmap depicting z scores of 5 MHCsig in the 6% top-ranked genes in 17 CRISPR/Cas9 datasets. D.

Relative expression of 5 MHCsig in the breast cancer cells. E. Relative expression of 5 MHCsig in the neuroblastoma cells.



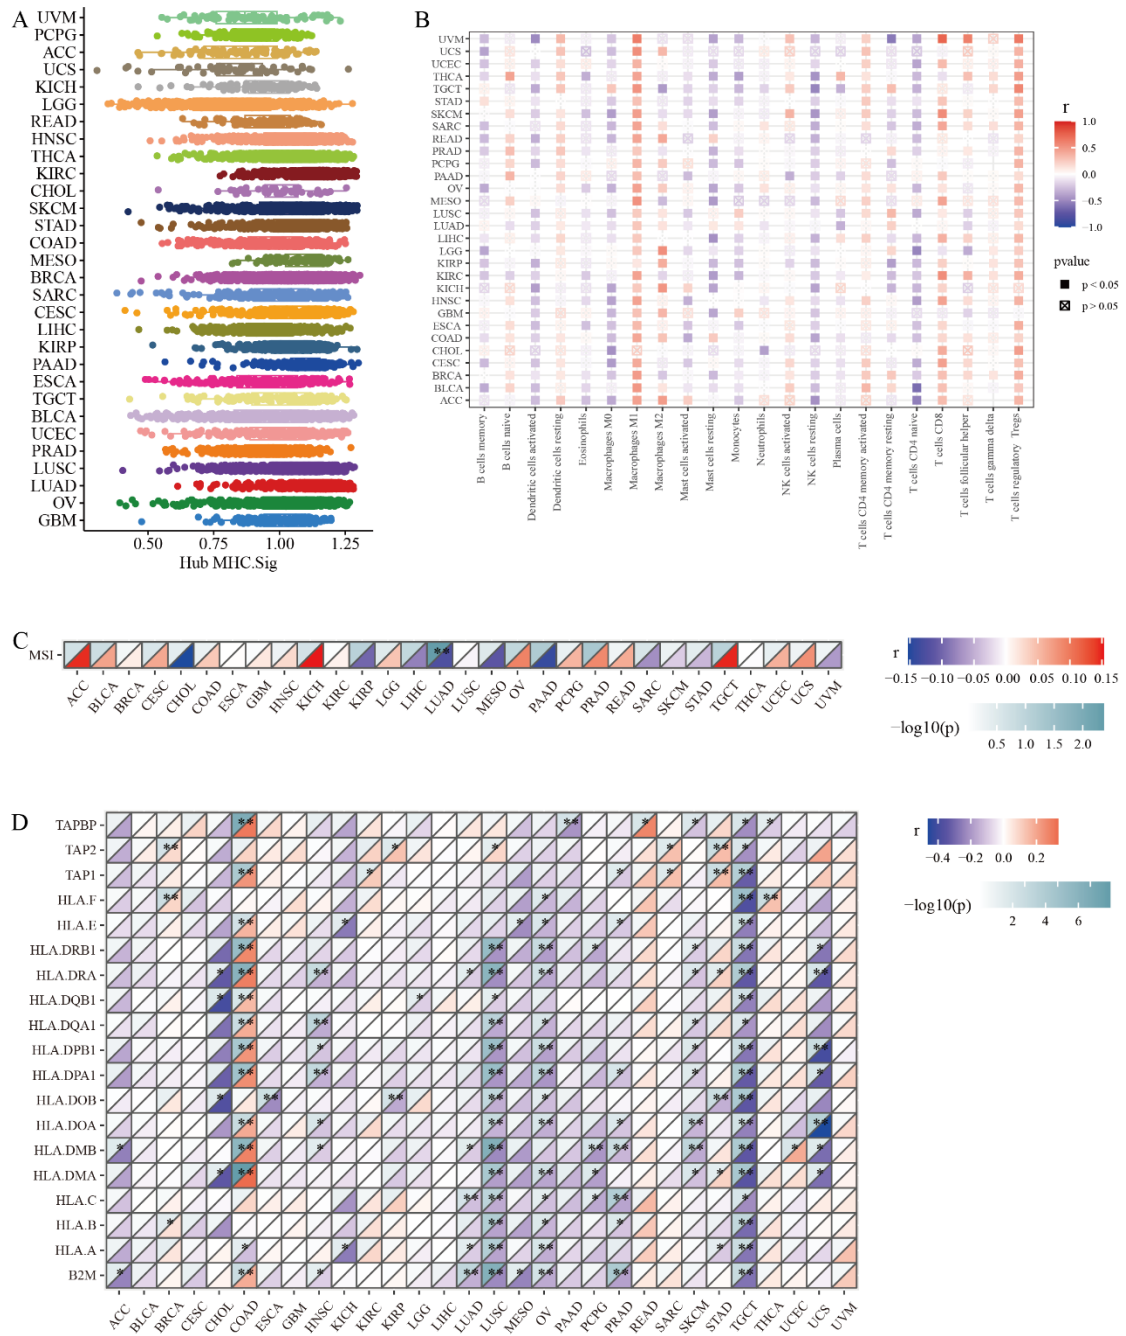

**Figure S3. Landscape of Hub-MHCsig in pan-cancer.** A. The scores of Hub-MHCsig in 30 cancers. B. The correlation between the scores of Hub-MHCsig and the abundance of immune cell infiltration. C. The correlation between the scores of Hub-MHCsig and microsatellite instability. D. The correlation between the 19 Hub-MHCsig and microsatellite instability.

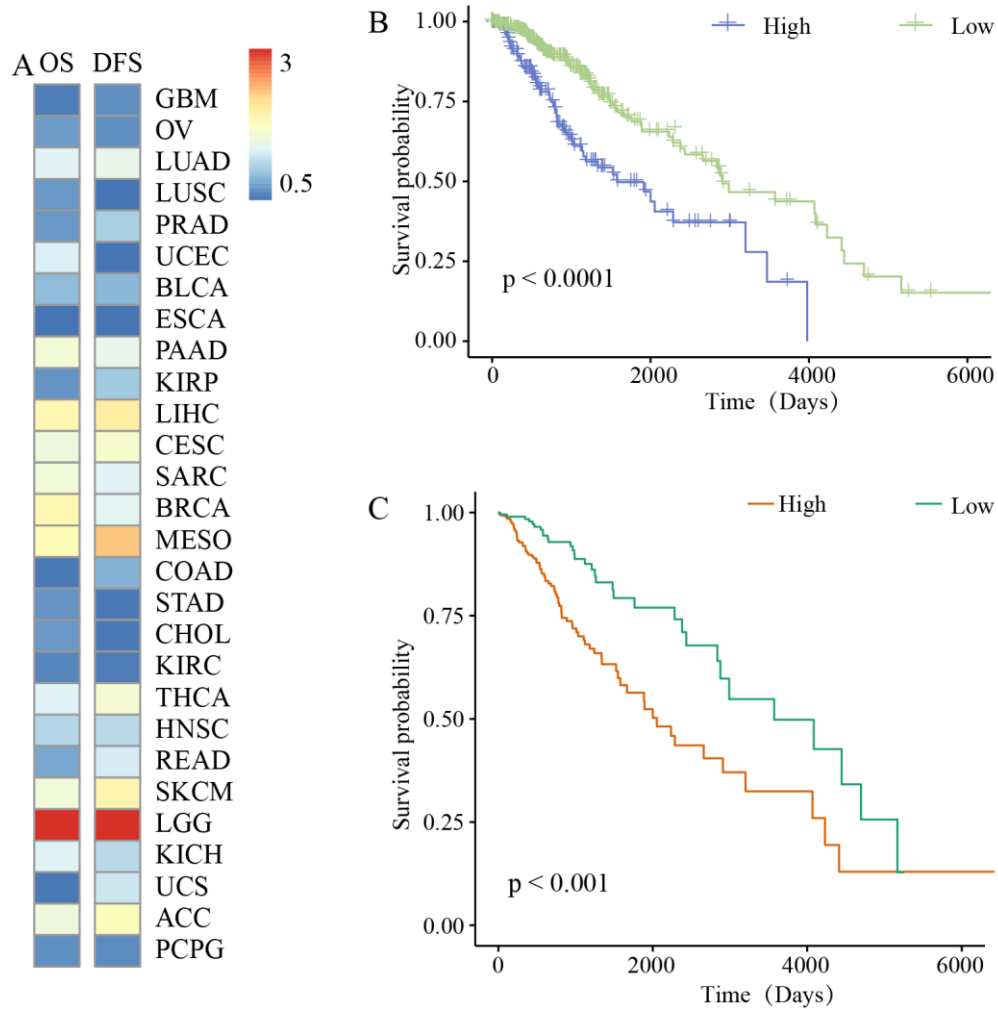

**Figure S4. Survival analysis of Hub-MHCsig in pan-cancer.** A. Overall survival and disease-special survival analysis of Hub-MHCsig in pan-cancer. B. Overall survival analysis of Hub-MHCsig in low-grade glioma. C. Disease-special survival analysis of Hub-MHCsig in low-grade glioma.

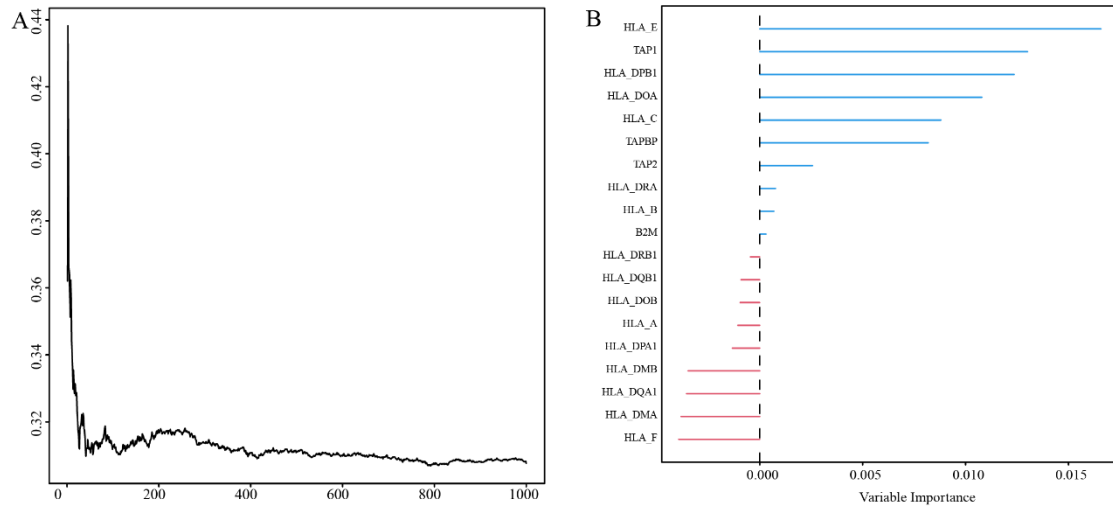

**Figure S5. Screening of LGG-related Hub-MHCsig.** A. Error rates of Hub-MHCsig in random forest model. B. Importance ranking plot of Hub-MHCsig in the random forest model.

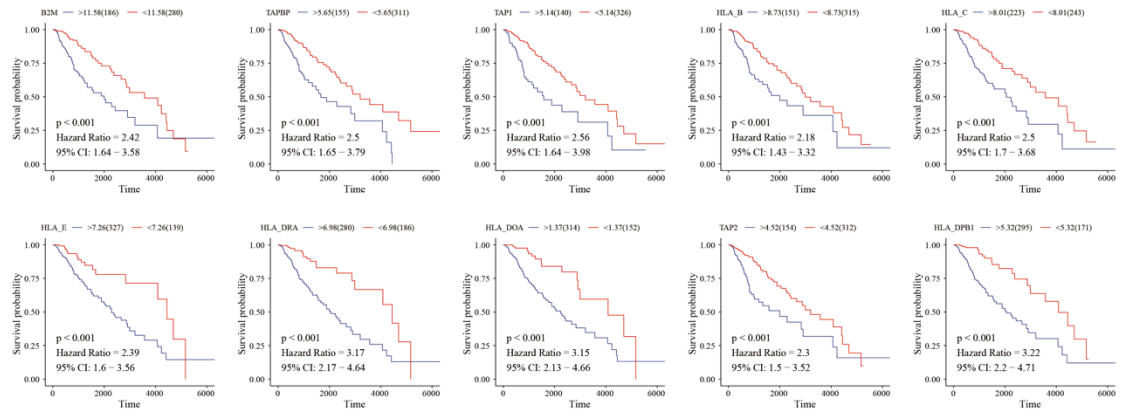

**Figure S6. Disease-special survival analysis of 10 LGG-related Hub-MHCsig in LGG.**

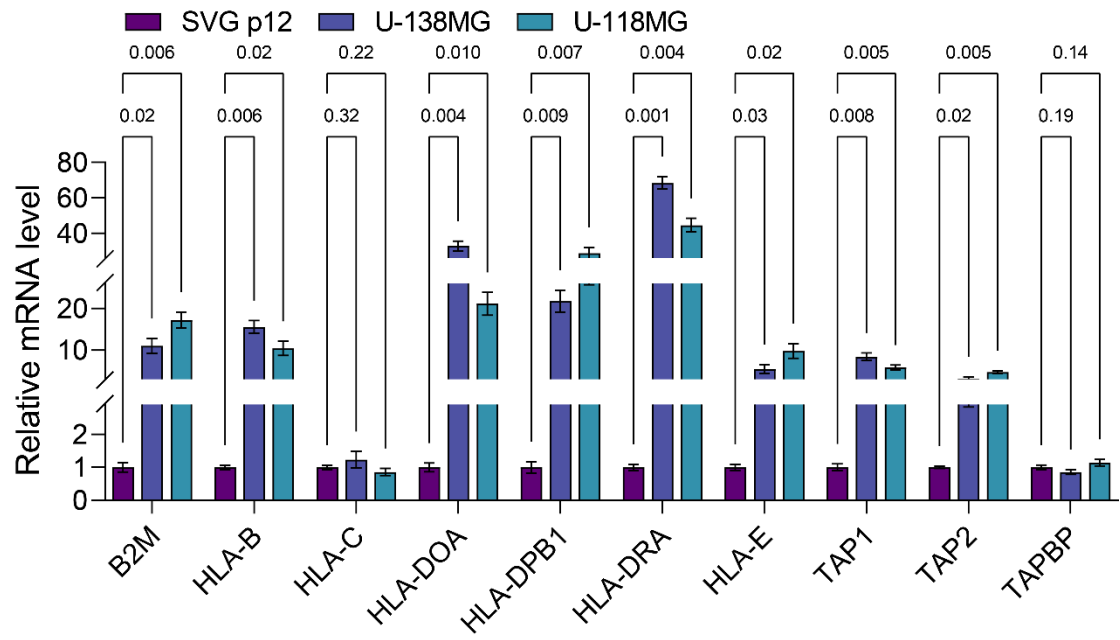

**Figure S7. The mRNA expression of 10 LGG-related Hub-MHCsig in cell lines.**

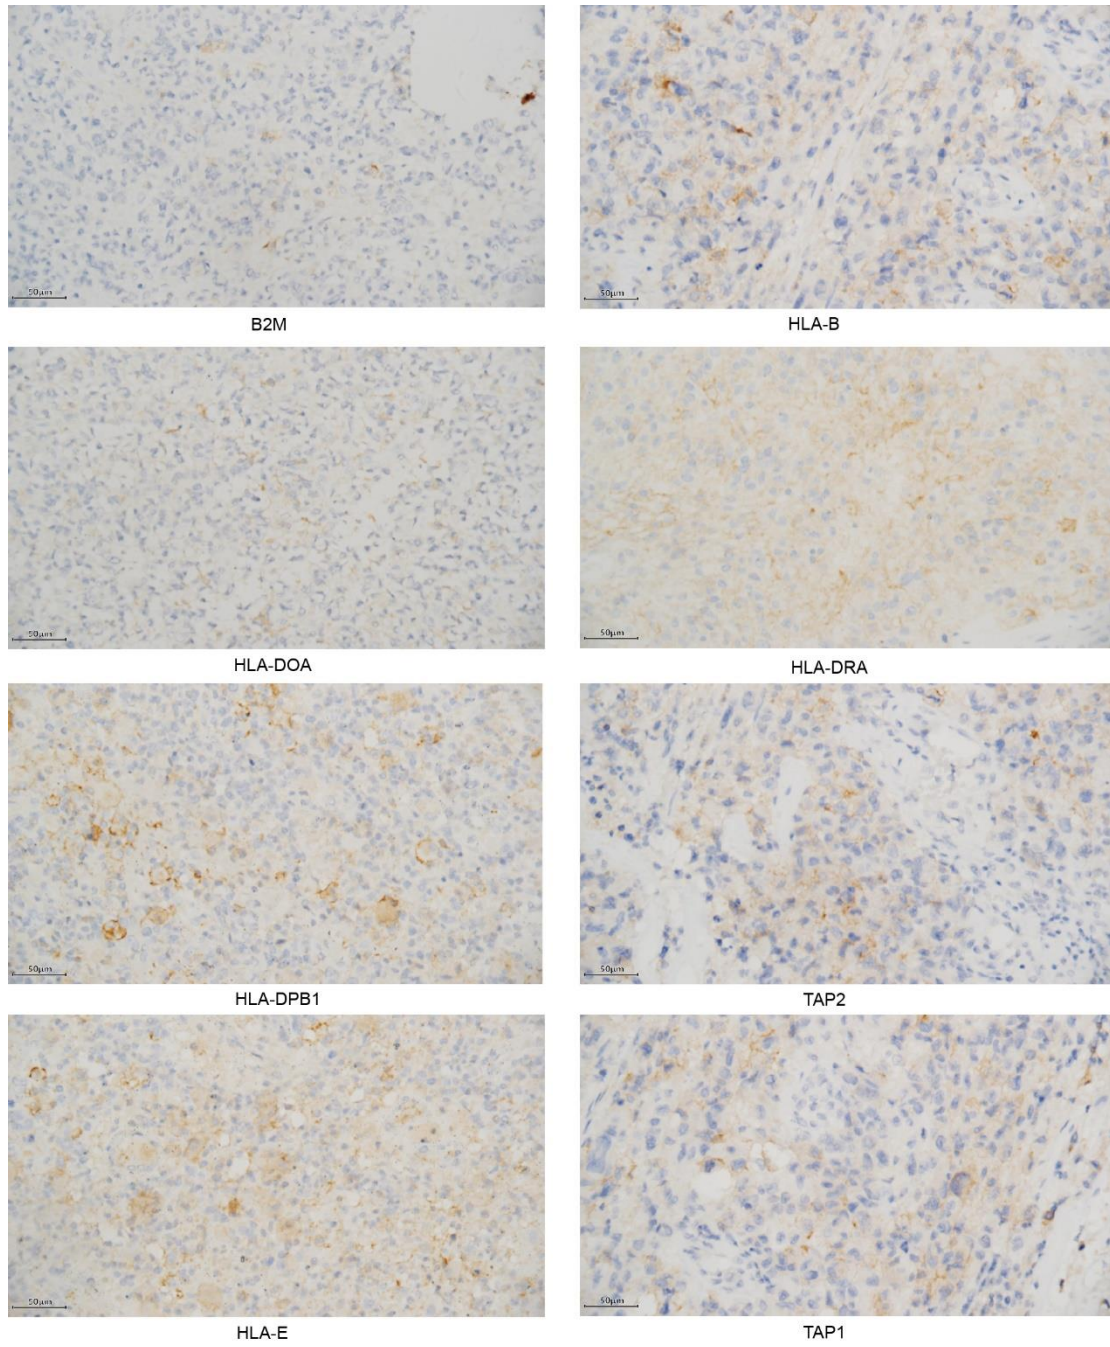

**Figure S8. The expression of 8 LGG-related Hub-MHCsig in LGG patients from our clinical data.**

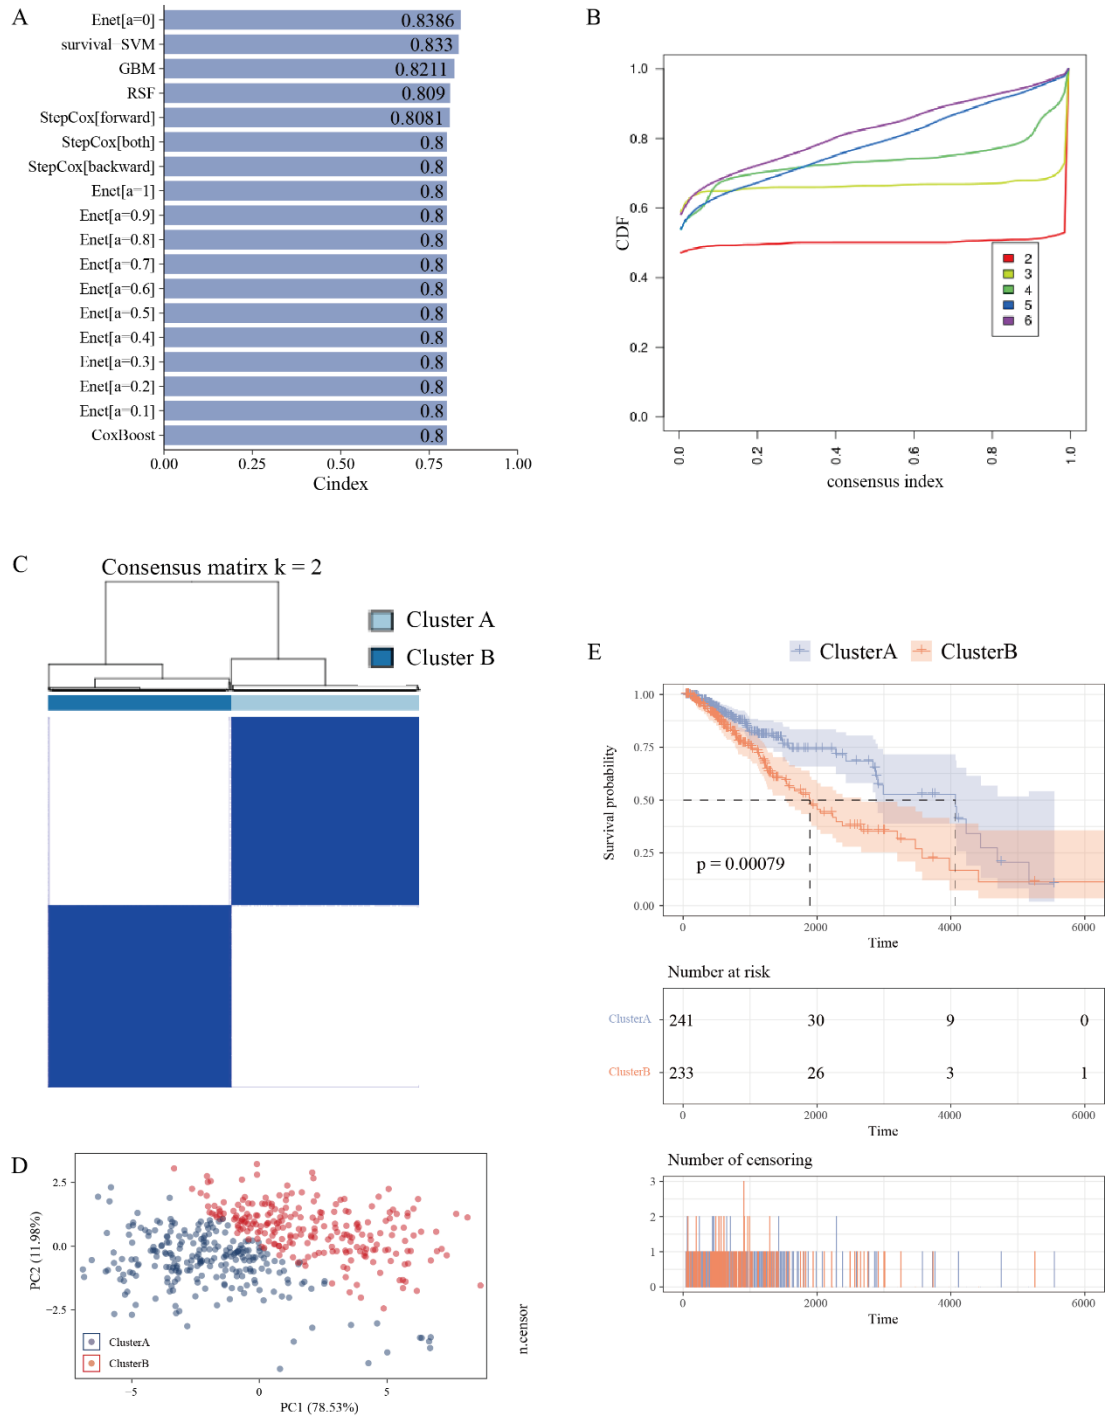

**Figure S9. Construction of the prognostic model in LGG.** A. 10 LGG-related Hub-MHCsig were used in the TCGA-BLCA dataset to construct a model for predicting patient prognosis through different machine learning algorithms. B. Cumulative distribution function. C. Two consensus clusters in the TCGA-BLCA dataset. D. Principal co-ordinates analysis. E. Survival analysis.

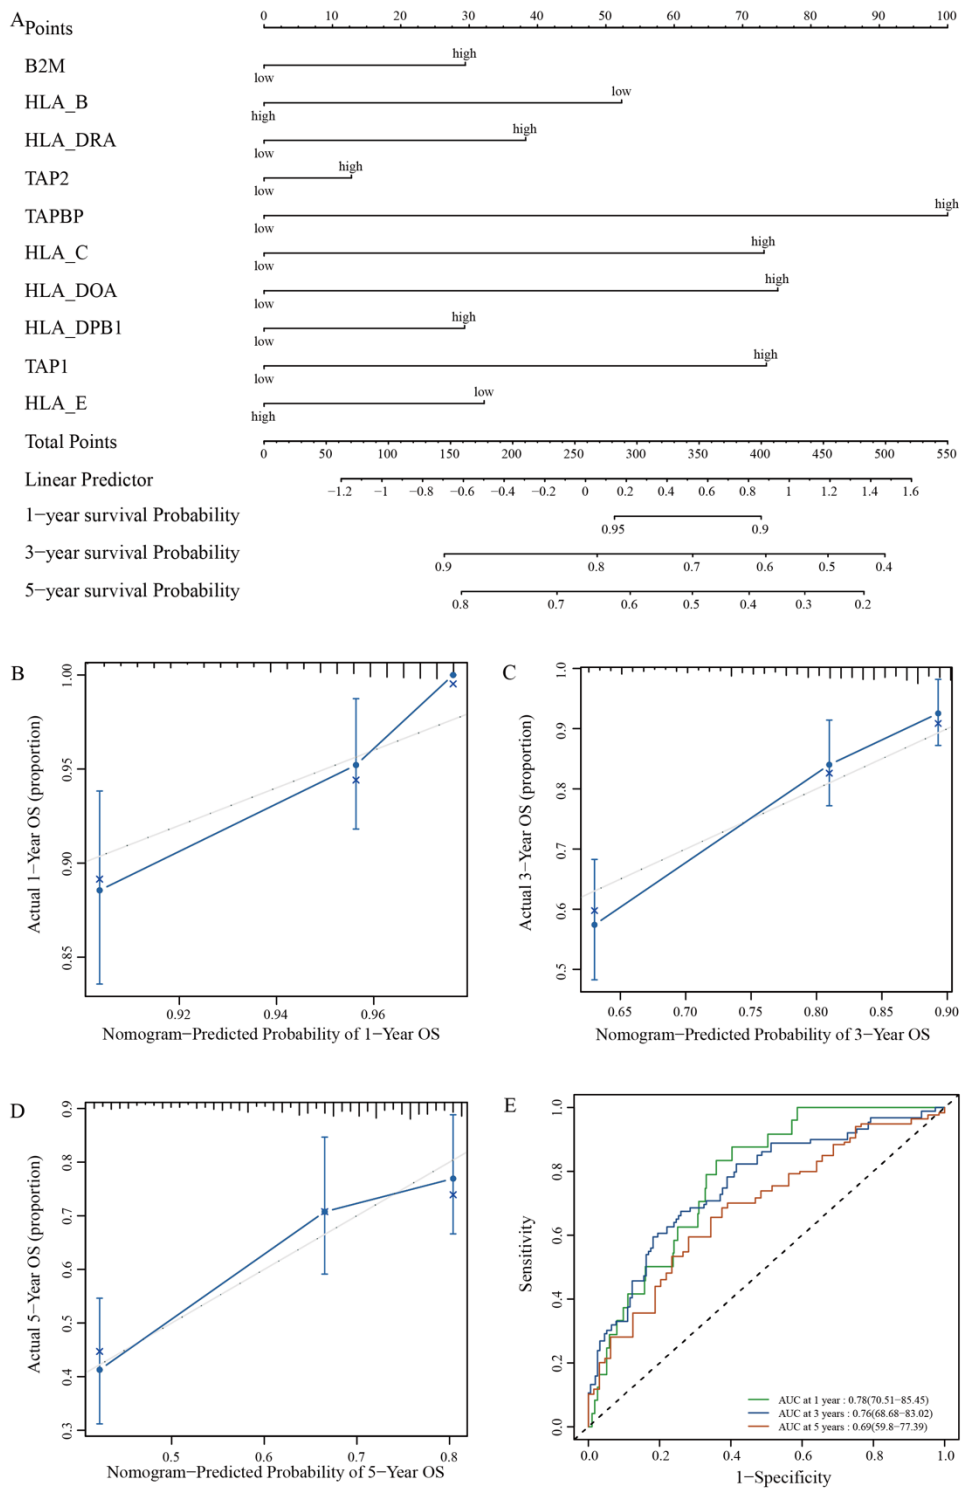

**Figure S10. Nomogram contribution.** A. Cox regression model nomogram of 10 LGG-related Hub-MHCsig. B. The 1-year calibration curve. C. The 3-year calibration curve. D. The 5-year calibration curve. E. The time-dependent ROC curves.



A

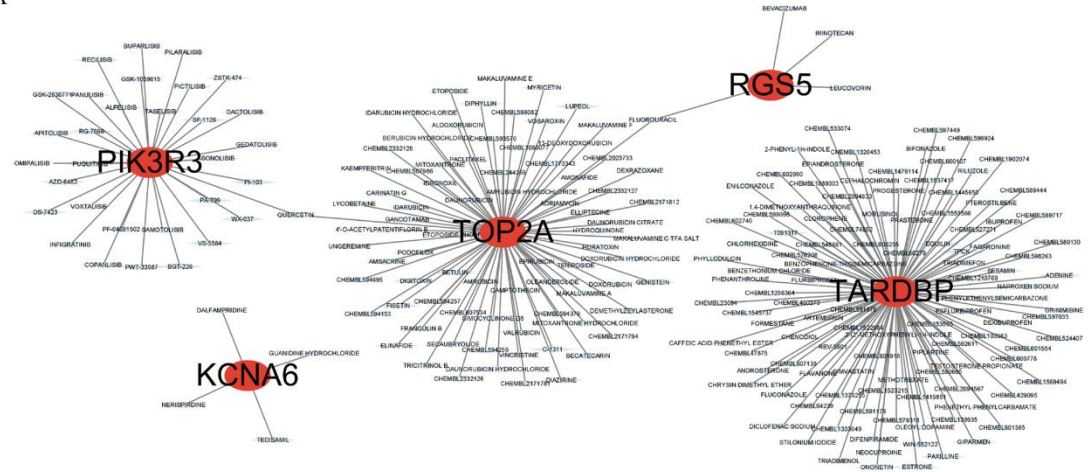

B

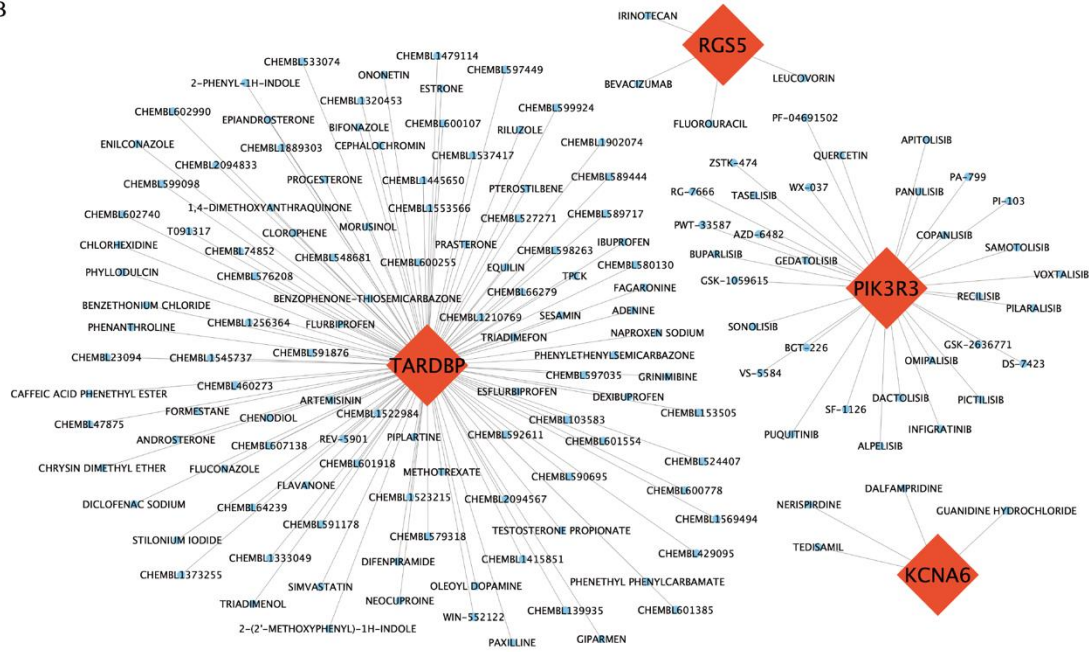

Figure S11. LGG-related Hub-MHCsig-drug networks. A. ClusterA. B. ClusterB.

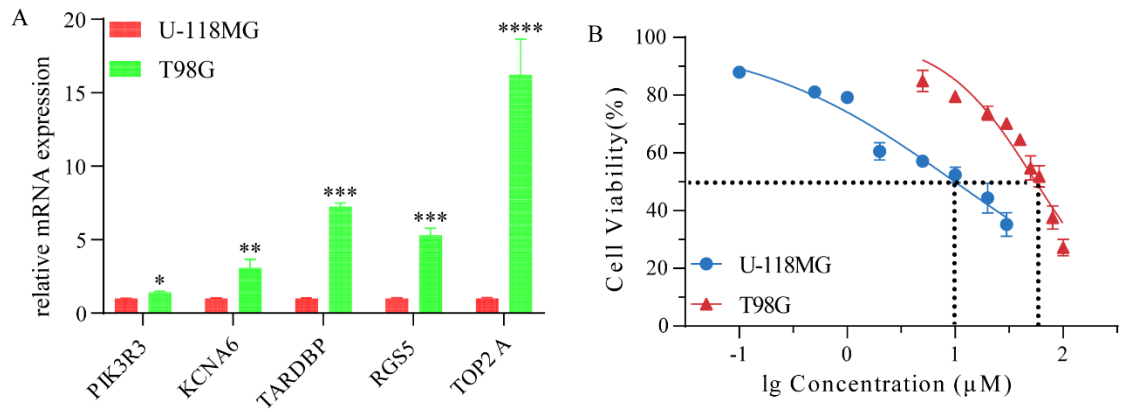

**Figure S12. 5 LGG-related Hub-MHCsig in the LGG cells.** A. Relative expression of 5 LGG-related Hub-MHCsig in the LGG cells. B. Half maximal inhibitory concentration of Adriamycin in the LGG cells.



**Figure S13. Regulatory networks of 10 LGG-related Hub-MHCsig.** A. LGG-related Hub-MHCsig-miRNA network. B. LGG-related Hub-MHCsig-transcription factor network.
